# Supplementary material for: Epithelial Alarmins in Serum and Exhaled Breath in Patients with Idiopathic Pulmonary Fibrosis: A Prospective One-Year Follow-Up Cohort Study
Source: PubMed Central journal article supplement (PMC6832270; doi:10.3390/jcm8101590), 2019-10-02
Supplement: jcm-08-01590-s001.pdf [file jcm-08-01590-s001.pdf]

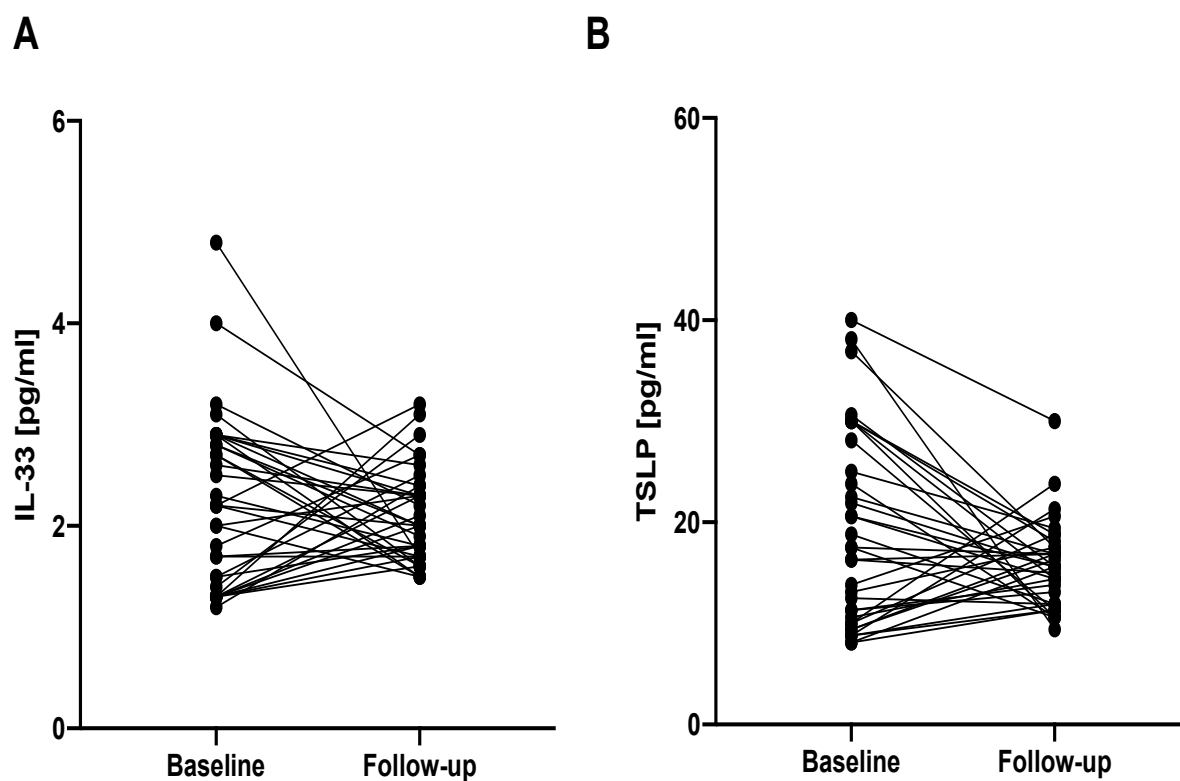

**Figure S1.** Changes in the epithelial alarmin levels in the serum of patients with IPF before and after 12 months of antifibrotic therapy

**Notes:** Panels showing: (A) change in IL-33 serum level; (B) change in TSLP serum level.

**Abbreviations:** IPF – idiopathic pulmonary fibrosis, IL-33 – interleukin 33, TSLP – thymic stromal lymphopoietin.

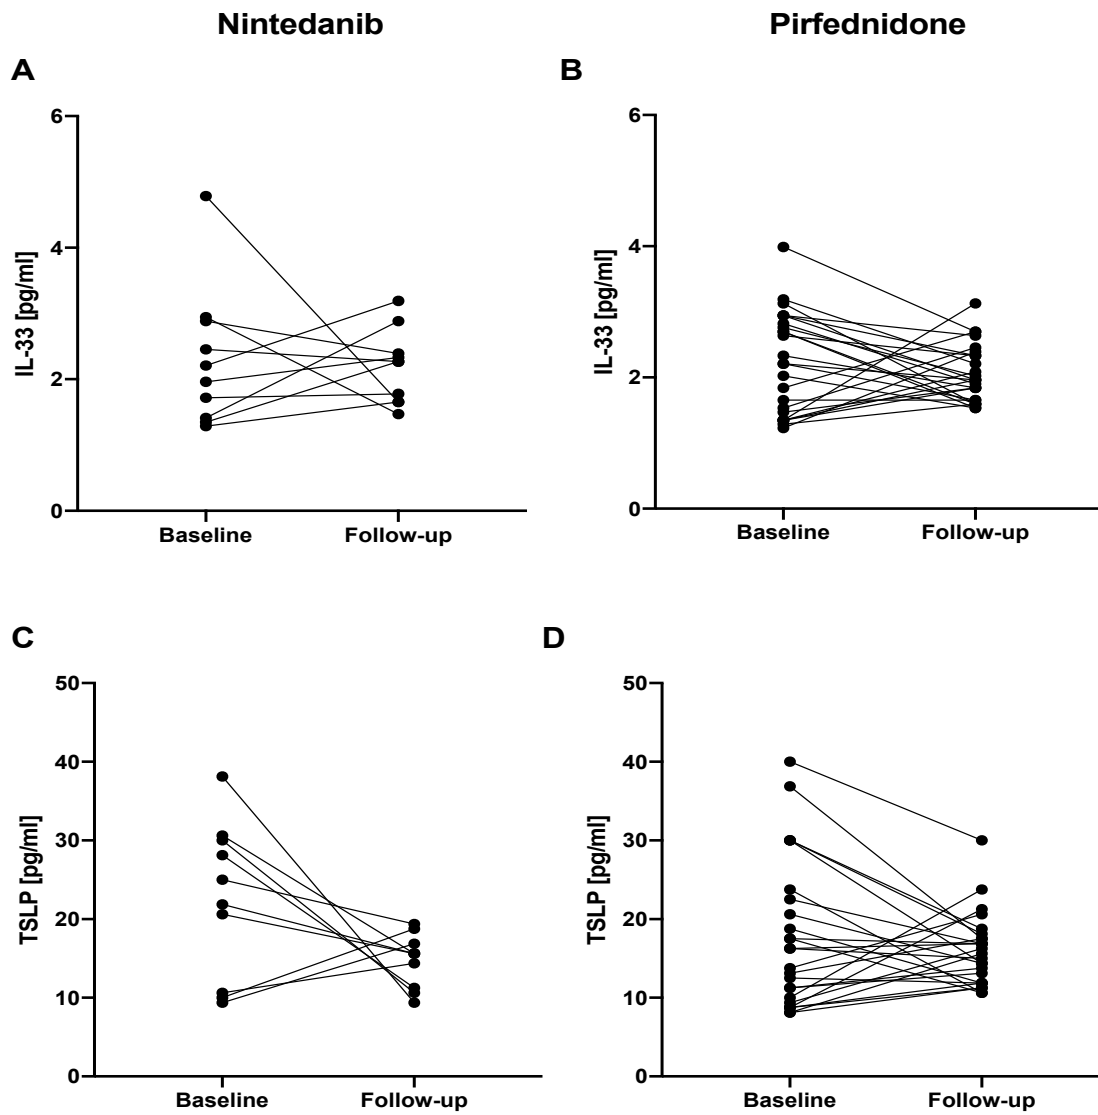

**Figure S2.** Changes in the epithelial alarmin levels in the serum of patients with IPF before and after 12 months of antifibrotic therapy according to the antifibrotic agent used.

**Notes:** Panels showing: (A) change in IL-33 serum level in IPF patients treated with nintedanib; (B) change in IL-33 serum level in IPF patients treated with pirfenidone; (C) change in TSLP serum level in IPF patients treated with nintedanib; (D) change in TSLP serum level in IPF patients treated with pirfenidone.

**Abbreviations:** IPF – idiopathic pulmonary fibrosis; IL-33 – interleukin 33, TSLP – thymic stromal lymphopoietin.

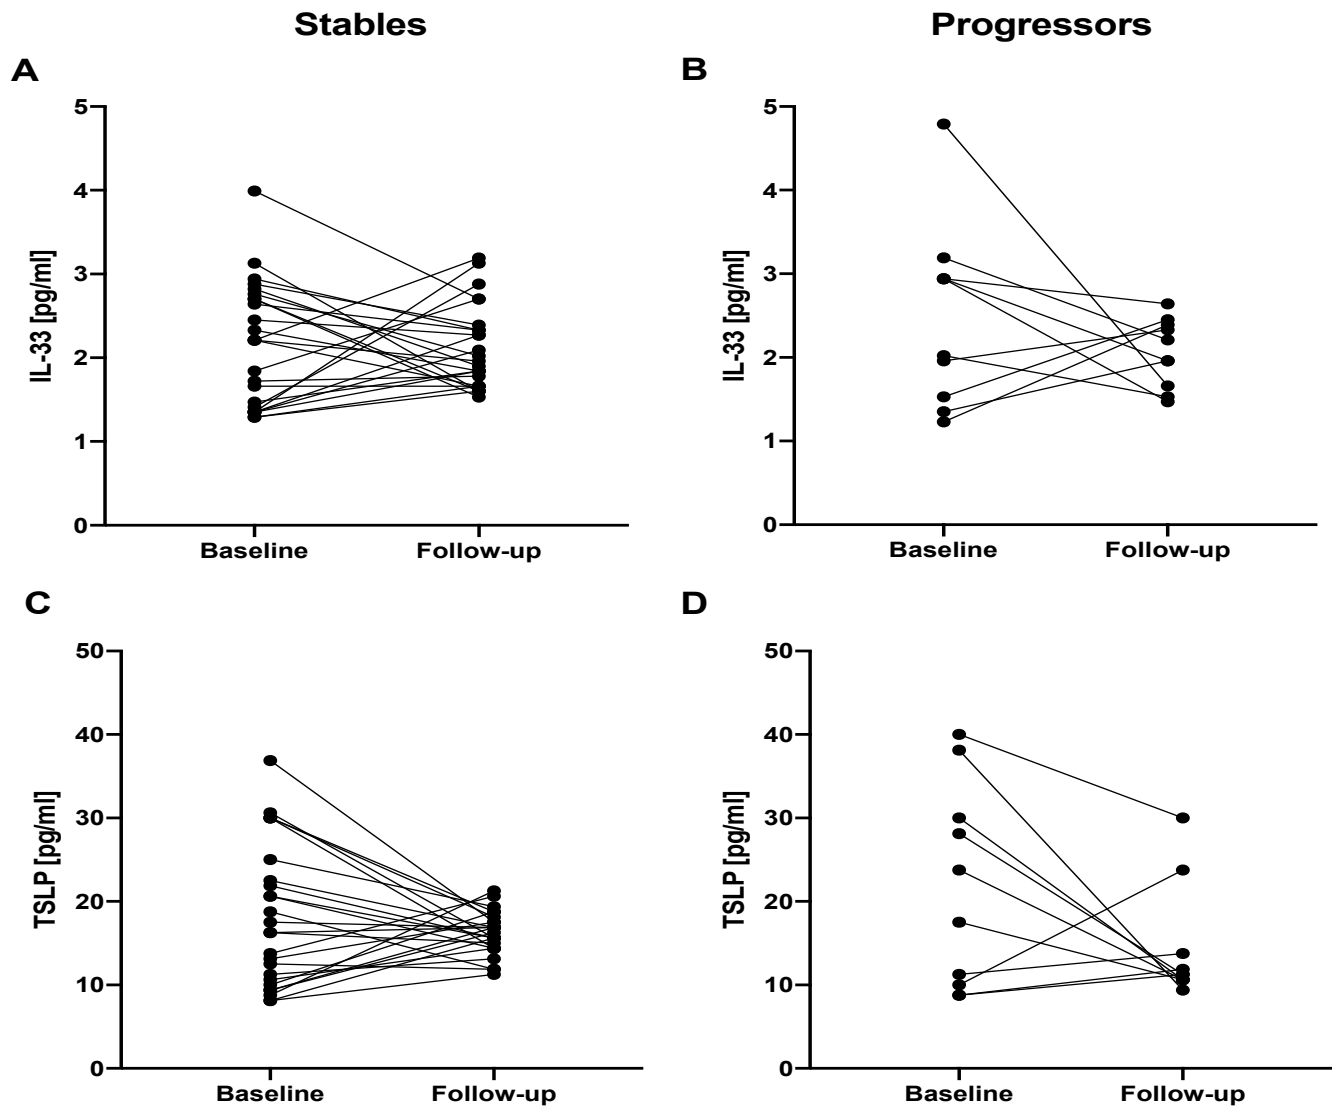

**Figure S3.** Changes in the epithelial alarmin levels in the serum of patients with IPF before and after 12 months of antifibrotic therapy according to the functional decline (stables – FVC % of predicted decline/year  $\leq$  5%; progressors – FVC % of predicted decline/year  $>$  5%)

**Notes:** Panels showing: (A) change in IL-33 serum levels in stable IPF patients; (B) change in IL-33 serum levels in progressor IPF patients; (C) change in TSLP serum levels in stable IPF patients; (D) change in TSLP serum levels in progressor IPF patients.

**Abbreviations:** IPF – idiopathic pulmonary fibrosis; IL-33 – interleukin 33, TSLP – thymic stromal lymphopoietin.

**Table S1.** Correlations of the epithelial alarmin levels in the serum and EBC of patients with IPF.

|       |                  | Serum             |                  |                   | EBC              |                  |                 |
|-------|------------------|-------------------|------------------|-------------------|------------------|------------------|-----------------|
|       |                  | IL-33<br>(pg/ml)  | IL-25<br>(pg/ml) | TSLP<br>(pg/ml)   | IL-33<br>(pg/ml) | IL-25<br>(pg/ml) | TSLP<br>(pg/ml) |
| Serum | IL-33<br>(pg/ml) |                   | r=0.12           | <b>r=0.62****</b> | <b>r=-0.29*</b>  | r=0.12           | <b>r=-0.28*</b> |
|       | IL-25<br>(pg/ml) | r=0.12            |                  | <b>r=0.28*</b>    | r=-0.02          | r=0.05           | r=0.27          |
|       | TSLP<br>(pg/ml)  | <b>r=0.62****</b> | <b>r=0.28*</b>   |                   | <b>r=-0.37**</b> | r=-0.03          | r=-0.04         |
| EBC   | IL-33<br>(pg/ml) | <b>r=-0.29*</b>   | r=-0.02          | <b>r=-0.37**</b>  |                  | r=-0.17          | r=0.05          |
|       | IL-25<br>(pg/ml) | r=0.12            | r=0.05           | r=-0.03           | r=-0.17          |                  | r=-0.13         |
|       | TSLP<br>(pg/ml)  | <b>r=-0.28*</b>   | r=0.27           | r=-0.04           | r=0.05           | r=-0.13          |                 |

Notes: \*p<0.05; \*\*p<0.01; \*\*\*\* p<0.0001

Abbreviations: EBC – exhaled breath condensate, IPF – idiopathic pulmonary fibrosis, IL-25 – interleukin 25, IL-33 – interleukin 33, TSLP – thymic stromal lymphopoietin.

**Table S2.** Correlations between the epithelial alarmin levels and clinical measures in patients with IPF.

|       |                  | FEV <sub>1</sub> (l) | FEV <sub>1</sub> % | FVC (l) | FVC%     | FEV <sub>1</sub> /FVC% | T <sub>lco</sub><br>(mmol/min<br>/kPa) | T <sub>lco</sub><br>% of<br>predicted | Age<br>(years)   | Time<br>since<br>diagnosis<br>(years) | Pack-<br>years | GAP<br>score | CPI<br>score    | 6MWT<br>(meters) |
|-------|------------------|----------------------|--------------------|---------|----------|------------------------|----------------------------------------|---------------------------------------|------------------|---------------------------------------|----------------|--------------|-----------------|------------------|
| Serum | IL-33<br>(pg/ml) | r=-0.05              | r=0.0007           | r=-0.05 | r=-0.03  | r=0.15                 | r=0.14                                 | r=0.20                                | r=-0.003         | <b>r=-0.33*</b>                       | r=0.04         | r=-0.20      | <b>r=-0.31*</b> | r=-0.14          |
|       | IL-25<br>(pg/ml) | r=-0.10              | <b>r=-0.30*</b>    | r=-0.02 | r=-0.20  | r=-0.11                | r=-0.02                                | r=-0.05                               | r=-0.06          | r=-0.12                               | r=-0.05        | r=0.08       | R=-0.04         | r=-0.18          |
|       | TSLP<br>(pg/ml)  | r=0.02               | r=0.003            | r=0.07  | r=0.04   | r=-0.14                | r=0.19                                 | r=0.20                                | r=0.03           | <b>r=-0.50***</b>                     | r=0.09         | r=-0.14      | R=-0.25         | r=-0.17          |
| EBC   | IL-33<br>(pg/ml) | r=-0.01              | r=0.05             | r=-0.02 | r=0.03   | r=0.04                 | r=0.01                                 | r=-0.0002                             | r=0.12           | <b>r=0.51***</b>                      | r=-0.03        | r=0.03       | r=0.002         | r=0.04           |
|       | IL-25<br>(pg/ml) | <b>r=-0.32*</b>      | r=-0.18            | r=-0.25 | r=-0.16  | r=0.10                 | r=-0.08                                | r=0.006                               | r=-0.06          | r=0.04                                | r=-0.02        | r=-0.10      | r=-0.06         | r=0.006          |
|       | TSLP<br>(pg/ml)  | r=0.22               | r=-0.05            | r=0.23  | r=-0.007 | r=-0.06                | r=-0.05                                | r=-0.23                               | <b>r=-0.36**</b> | r=-0.08                               | r=0.04         | r=0.05       | r=0.25          | r=0.12           |

Notes: \* p<0.05; \*\* p<0.01; \*\*\* p<0.001.

**Abbreviations:** EBC – exhaled breath condensate, IPF – idiopathic pulmonary fibrosis, FEV<sub>1</sub> – forced expiratory volume in 1 second, FVC - forced vital capacity, T<sub>lco</sub> – transfer factor of the lung for carbon monoxide, GAP – gender, age, and 2 physiology variables (FVC and T<sub>lco</sub>), CPI – composite physiologic index, 6MWT – six-minute walk test.

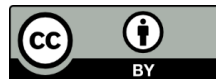

© 2019 by the authors. Licensee MDPI, Basel, Switzerland. This article is an open access article distributed under the terms and conditions of the Creative Commons Attribution (CC BY) license (<http://creativecommons.org/licenses/by/4.0/>).
